# Supplementary material for: Causal modelling of heavy-tailed variables and confounders with application to river flow
Source: PubMed Central journal article supplement (PMC10423152; doi:10.1007/s10687-022-00456-4), 2022-12-17
Supplement: 10687_2022_456_MOESM1_ESM.pdf [file 10687_2022_456_MOESM1_ESM.pdf]

**SUPPLEMENTARY MATERIAL TO**  
**“CAUSAL MODELLING OF HEAVY-TAILED VARIABLES AND**  
**CONFOUNDERS WITH APPLICATION TO RIVER FLOW”**

**Olivier C. Pasche**

Research Center for Statistics, University of Geneva, Switzerland,  
Institute of Mathematics, EPFL, 1015 Lausanne, Switzerland,  
olivier.pasche@unige.ch

**Valérie Chavez-Demoulin**

Faculty of Business and Economics, University of Lausanne, Switzerland,  
valerie.chavez@unil.ch

**Anthony C. Davison**

Institute of Mathematics, EPFL, 1015 Lausanne, Switzerland,  
anthony.davison@epfl.ch

## **S.1 Variables with Comparable Tails**

### **S.1.1 Non-Parametric Causal Tail Coefficient Estimator**

Figure S.1 shows the sample distributions of the non-parametric estimators  $\hat{\Gamma}_{1,2}$  and  $\hat{\Gamma}_{2,1}$  for all four causal structures, for the  $t_4$ , Pareto(1, 2) and LogN(0, 1) noise distributions, respectively. The true coefficient values  $\Gamma_{1,2}$  and  $\Gamma_{2,1}$  are obtained using (2). Figure S.2 shows the sample distribution of the coefficient difference estimator  $\hat{\Delta}_{1,2} := \hat{\Gamma}_{1,2} - \hat{\Gamma}_{2,1}$  for the  $t_4$  noise distribution.

### **S.1.2 LGPD Causal Tail Coefficient with Post-Fit and Constrained Fit Corrections**

Figure S.3 shows the sample distribution of  $\hat{\Gamma}_{1,2|H}^{\text{GPD}}$  and  $\hat{\Gamma}_{2,1|H}^{\text{GPD}}$  with the constrained fit, for a comparable confounder tail. Figure S.4 shows the sample distribution of  $\hat{\Gamma}_{1,2|H}^{\text{GPD}}$  and  $\hat{\Gamma}_{2,1|H}^{\text{GPD}}$  with post-fit correction for all four causal configurations, for the  $t_4$ , Pareto(1, 2) and LogN(0, 1) noise distributions.

## **S.2 Application Results for Competitors**

Table S.1 shows the causal coefficients between the discharge station pairs estimated using ICA-LiNGAM, with and without considering the average catchment precipitation variable.

CAUSAL MODELLING OF HEAVY-TAILED VARIABLES AND CONFOUNDERS...

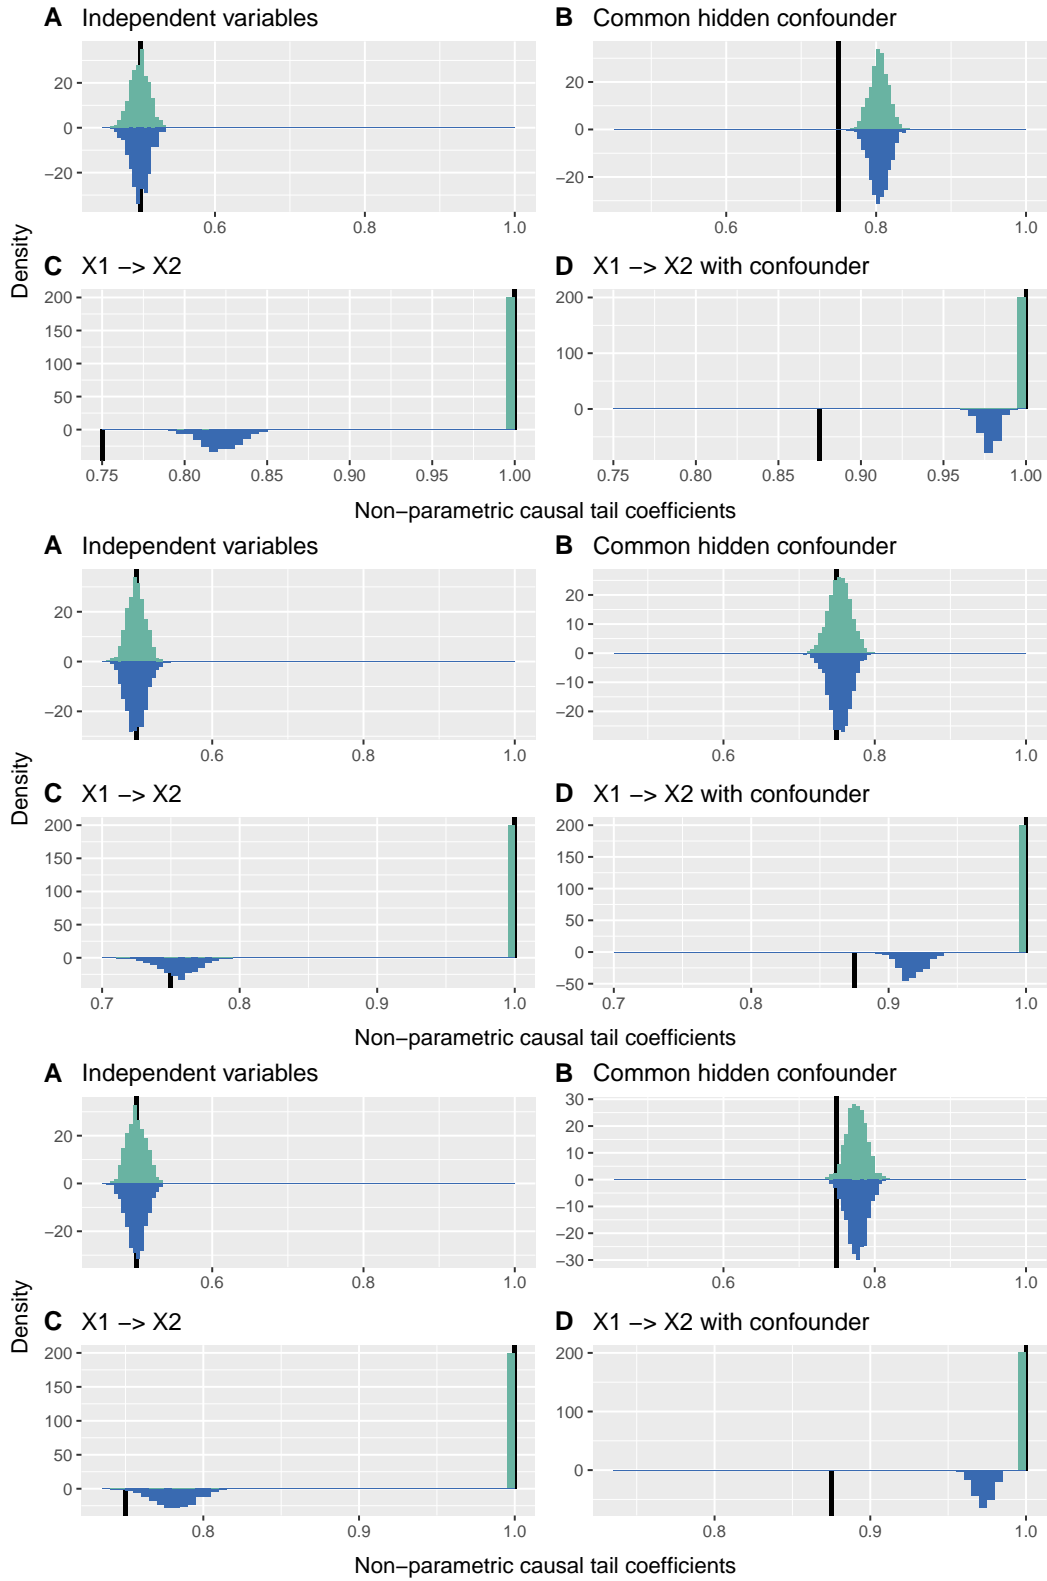

Figure S.1: Histograms of  $\hat{\Gamma}_{1,2}$  (turquoise) and  $\hat{\Gamma}_{2,1}$  (blue) for  $t_4$  (top four panels),  $\text{Pareto}(1, 2)$  (middle four panels) and  $\text{LogN}(0, 1)$  (bottom four panels) distributed noise variables, for the four causal configurations. Half-lines (black) indicate  $\Gamma_{1,2}$  and  $\Gamma_{2,1}$ .

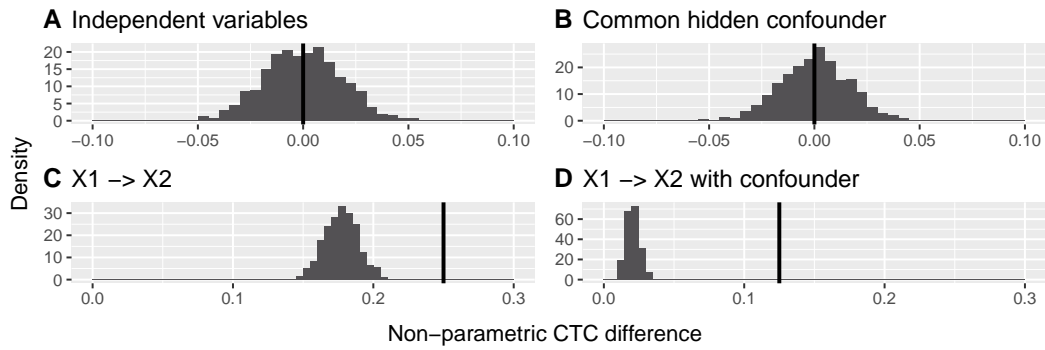

Figure S.2: Histogram of  $\hat{\Delta}_{1,2}$  for  $t_4$  distributed noise variables, for the four causal configurations. Lines indicate  $\Delta_{1,2} = \Gamma_{1,2} - \Gamma_{2,1}$ .

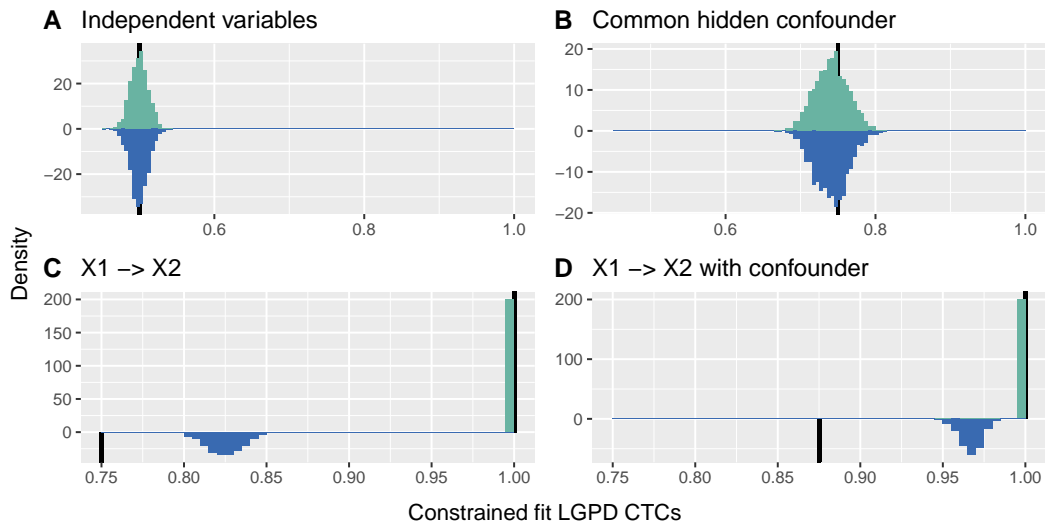

Figure S.3: Histograms of  $\hat{\Gamma}_{1,2|H}^{\text{GPD}}$  (turquoise) and  $\hat{\Gamma}_{2,1|H}^{\text{GPD}}$  (blue) with constrained fit for  $t_4$  distributed noise variables, for the four causal configurations. Half-lines (black) indicate  $\Gamma_{1,2}$  and  $\Gamma_{2,1}$ .

CAUSAL MODELLING OF HEAVY-TAILED VARIABLES AND CONFOUNDERS...

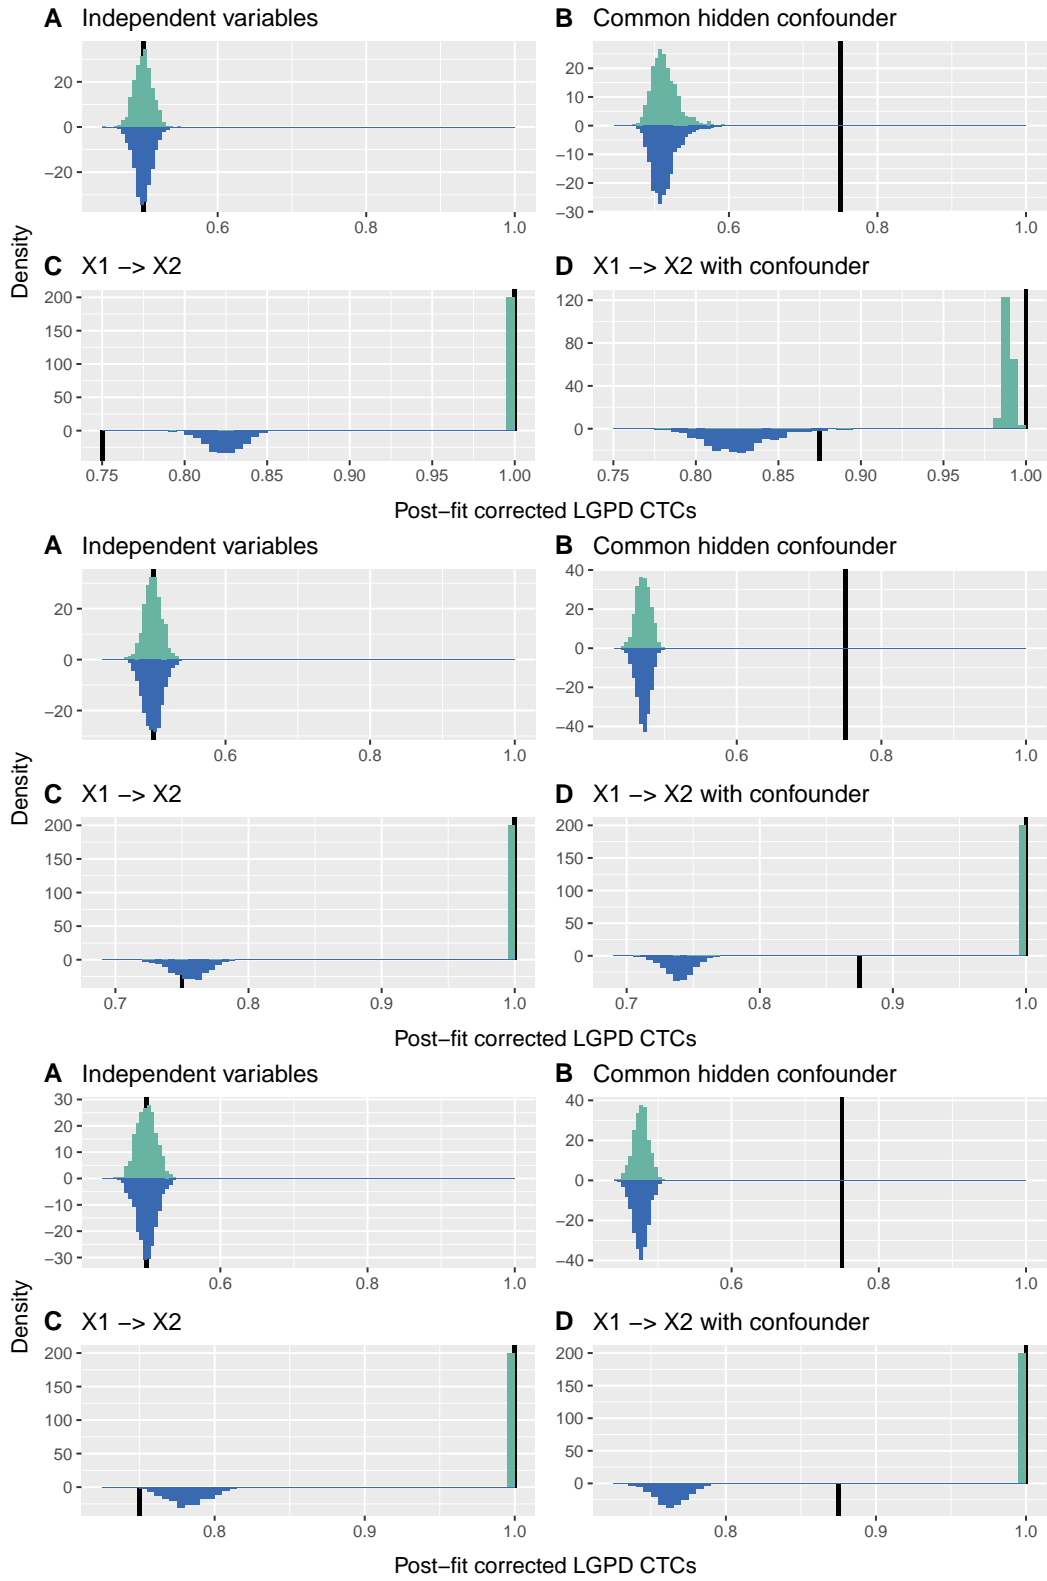

Figure S.4: Histograms of  $\hat{\Gamma}_{1,2|H}^{\text{GPD}}$  (turquoise) and  $\hat{\Gamma}_{2,1|H}^{\text{GPD}}$  (blue) with post-fit correction for  $t_4$  (top four panels), Pareto(1, 2) (middle four panels) and LogN(0, 1) (bottom four panels) distributed noise variables, for the four causal configurations. Half-lines (black) indicate  $\Gamma_{1,2}$  and  $\Gamma_{2,1}$ .

Table S.1: Linear causal coefficients for the discharge station pairs estimated with the ICA-LiNGAM algorithm using either the station pair only (LiNGAM, two variables) or the station pair and precipitation (LiNGAM- $H$ , three variables). Non-null values indicate significant causal effects. The arrows indicate the estimated direct causal directions between the stations.

| Stations | Pair type | LiNGAM             | LiNGAM- $H$        |
|----------|-----------|--------------------|--------------------|
| 43-62    | causal    | 1.92 $\rightarrow$ | 2.02 $\rightarrow$ |
| 42-63    | causal    | 2.08 $\rightarrow$ | 2.21 $\rightarrow$ |
| 36-63    | causal    | 3.29 $\rightarrow$ | 3.61 $\rightarrow$ |
| 24-61    | causal    | 2.96 $\rightarrow$ | 3.03 $\rightarrow$ |
| 44-61    | causal    | 2.66 $\rightarrow$ | 2.83 $\rightarrow$ |
| 22-38    | causal    | 2.35 $\rightarrow$ | 2.35 $\rightarrow$ |
| 22-35    | causal    | 2.55 $\rightarrow$ | 2.55 $\rightarrow$ |
| 30-45    | non-caus. | 0.84 $\rightarrow$ | 0.87 $\rightarrow$ |
| 36-39    | non-caus. | 0.66 $\leftarrow$  | 0.66 $\leftarrow$  |
| 42-34    | non-caus. | 1.39 $\leftarrow$  | 1.29 $\leftarrow$  |
| 42-34*   | non-caus. | 1.39 $\leftarrow$  | 1.39 $\leftarrow$  |
| 32-33    | non-caus. | 0.59 $\rightarrow$ | 0.54 $\rightarrow$ |
| 62-63    | non-caus. | 1.02 $\rightarrow$ | 1.05 $\rightarrow$ |
| 57-60    | non-caus. | 0.68 $\rightarrow$ | 0.67 $\rightarrow$ |
| 13-14    | non-caus. | 0.50 $\leftarrow$  | 1.10 $\rightarrow$ |
| 17-22    | non-caus. | 1.80 $\rightarrow$ | 1.69 $\rightarrow$ |
| 12-21    | non-caus. | 1.04 $\rightarrow$ | 1.08 $\rightarrow$ |
| 26-28    | non-caus. | 0.75 $\leftarrow$  | 0.72 $\leftarrow$  |
| 27-31    | non-caus. | 0.54 $\rightarrow$ | 0.66 $\rightarrow$ |
| 23-39    | non-caus. | 0.25 $\rightarrow$ | 0.18 $\rightarrow$ |
| 23-35    | non-caus. | 0.42 $\rightarrow$ | 0.36 $\rightarrow$ |
